# Supplementary material for: The fabrication of a graphene and conductive polymer nanocomposite-coated highly flexible and washable woven thermoelectric nanogenerator
Source: Royal Society of Chemistry journal article supplement (doi:10.1039/d0ma01010c), 2021-01-01
Supplement: d0ma01010c1.pdf [file d0ma01010c1.pdf]

## Electronic Supplementary Information (ESI-1)

### Fabrication of Graphene and Conductive Polymer Nanocomposites Coated Highly Flexible and Washable Woven Thermoelectric Nanogenerator

Nazakat Ali<sup>1a</sup>, Guangyu Xu<sup>1b</sup>, Xie Jiao<sup>1c</sup>, Sun Tian<sup>3a</sup>, Wang Jiajun<sup>2a\*</sup>

#### Tables

**Table.1** Properties of cotton fabric coated with rGO and PEDOT:PSS nanocomposites

| Sample Code | Sheet Resistance (Rs) |               | Tensile Strength (mPa) |      | Water Contact Angle (WCA) | Air Permeability (cm <sup>3</sup> /cm <sup>2</sup> /s) | Fabric Thickness (μm) |
|-------------|-----------------------|---------------|------------------------|------|---------------------------|--------------------------------------------------------|-----------------------|
|             | Before Washing        | After Washing | Warp                   | Weft |                           |                                                        |                       |
| Pure Cotton | Nil                   | Nil           | 28                     | 20   | 73.4                      | 165                                                    | 227.8                 |
| GO Cotton   | 85                    | 95            | 32                     | 30   | 109.2                     | 156                                                    | 232.6                 |
| rGO-PES-1   | 65                    | 75            | 39                     | 35   | 121.3                     | 148                                                    | 236.4                 |
| rGO-PES-2   | 45                    | 55            | 47                     | 45   | 132.5                     | 141                                                    | 239.5                 |
| rGO-PES-3   | 25                    | 35            | 63                     | 60   | 139.4                     | 135                                                    | 227.8                 |
| rGO-PES-4   | 15                    | 25            | 65                     | 62   | 141.6                     | 126                                                    | 232.6                 |

**Note.** Average results are taken for each sample for the test results.

Table 1 demonstrates, the Effect of different weight percent of rGO on sheet resistance before and after washing cycles, tensile strength and air permeability.

**Tab 2.** Effect of rGO content percent and number of padding passes effect on electrical and thermoelectric properties

| Sample No. | Comp (rGO %) | Number of Padding Cycles | Sheet Resistance | Seebeck Coefficient | Power Factor          | Figure of Merit           |
|------------|--------------|--------------------------|------------------|---------------------|-----------------------|---------------------------|
|            |              |                          | (KΩ)             | (μV/K)              | (μW/mK <sup>2</sup> ) | ZT Value 10 <sup>-3</sup> |
| rGO/PES-1  | 2.5          | 10                       | 185±5            | 2.5                 | 0.12                  | 0.01                      |
| rGO/PES-2  | 5.0          | 10                       | 165±5            | 8.5                 | 0.15                  | 0.02                      |
| rGO/PES-3  | 10.0         | 10                       | 145±5            | 12.0                | 0.20                  | 0.03                      |
| rGO/PES-4  | 20.0         | 10                       | 125±5            | 15.6                | 0.25                  | 0.04                      |

**Note.** Average results are taken for each sample for the test results.

Table.2 Demonstrates, the effect of rGO content percent and number of padding passes on electric sheet resistance and thermoelectric performance of Nano generator

**Table.3** Comparison for Elemental Analysis of developed rGO coated fabric using proposed method

| Sample                                            | C (%) | O (%) | C/O  | Ref.      |
|---------------------------------------------------|-------|-------|------|-----------|
| Untreated                                         | 72.9  | 24.1  | 3.02 | [74]      |
| GO                                                | 73.7  | 22.4  | 3.29 | [75]      |
| rGO A.A                                           | 82.8  | 14.2  | 5.83 | [76]      |
| rGO NaBH <sub>4</sub>                             | 78.5  | 20.7  | 3.79 | [77]      |
| rGO H.H                                           | 83.6  | 13.3  | 6.26 | [78]      |
| rGO Na <sub>2</sub> S <sub>2</sub> O <sub>4</sub> | 85.5  | 14.0  | 6.15 | [79]      |
| rGO (A.A) 10% coated 1-5 Dips                     | 83.3  | 16.5  | 4.86 | This work |
| rGO (A.A) 10% coated 5-10 Dips                    | 85.7  | 13.4  | 6.24 | This work |
| rGO (A.A) 10% coated (15-Dips)                    | 87.4  | 10.6  | 8.0  | This work |

**Table.4** Thermoelectric performance of the developed device as compared to previously reported textile based wearable and washable devices

| Thermoelectric Materials for TE devices                         | Type of Substrate Fabrics | Electric conductivity (S/Cm) | Thermal conductivity (W/m·K) | Seebeck Coefficient ( $\mu\text{V K}^{-1}$ ) | Power Factor ( $\mu\text{W./mK}^2$ ) | Figure of merit ZT   | Output volts (mV) | Temperature gradient (K) | Ref. |
|-----------------------------------------------------------------|---------------------------|------------------------------|------------------------------|----------------------------------------------|--------------------------------------|----------------------|-------------------|--------------------------|------|
| PVDF/CNT                                                        | PVDF Fibers               | 14                           | 0.22–0.36                    | 57.6                                         | 90                                   | $5.0 \times 10^{-5}$ | 47.5              | 60.5                     | [80] |
| PVP-PEI/CNT-PEDOT:PSS                                           | PVP Yarns                 | 0.25-5.0                     | 0.32–0.42                    | 26.7                                         | 37.8                                 | $3.0 \times 10^{-4}$ | 140               | 80-120                   | [81] |
| Bi <sub>2</sub> Te <sub>3</sub> Sb <sub>2</sub> Te <sub>3</sub> | Silk Fibers               | 15                           | 0.35–0.75                    | 16.5                                         | 15.20                                | $5.0 \times 10^{-3}$ | 10.0              | 35.5                     | [82] |
| PEDOT:PSS                                                       | Polyester                 | 45                           | 0.36–0.42                    | 33.5                                         | 12.29                                | $5.0 \times 10^{-2}$ | 24.3              | 66-120                   | [83] |
| WPU/PEDOT:PSS/CNT                                               | Polyester                 | 13.86                        | 0.12–0.20                    | 10.0                                         | 1.41                                 | $7.8 \times 10^{-5}$ | 54.4              | 30-39                    | [84] |

|                                                                           |                        |         |               |       |       |               |              |        |              |
|---------------------------------------------------------------------------|------------------------|---------|---------------|-------|-------|---------------|--------------|--------|--------------|
|                                                                           | <b>Woven</b>           |         |               |       |       |               |              |        |              |
| $\text{Bi}_{0.5}\text{Sb}_{1.5}\text{Te}_3$ ,<br>$\text{Bi}_2\text{Se}_3$ | Polyester              | 26.4    | 0.38–<br>0.42 | 28.5  | 4.4   | 0.09          | 55.5         | 20.4   | [85]         |
|                                                                           | <b>Knitted</b>         |         |               |       |       |               |              |        |              |
| PEDOT:PSS/CN<br>T,                                                        | PET<br>Fibers          | 150.8   | 0.35–<br>0.86 | 25.82 | 32.4  | 0.08          | 143.7        | 80-116 | [86]         |
| PEDOT:PSS                                                                 | MWCNT<br>/PVP<br>fiber | 14.4    | 0.25–<br>0.50 | 15.0  | 65.5  | 0.42-<br>0.50 | 21.2         | 75.2   | [87]         |
| PEDOT-DMSO                                                                | Textile<br>Fabrics     | 0.5-2.5 | 0.45–<br>0.60 | 156.2 | 41.2  | 0.06-<br>0.09 | 18.7         | 39.0   | [88]         |
| PEDOT:PSS/CN<br>T/PEI                                                     | PU<br>Fibers           | 45.6    | 0.45–<br>0.75 | 25.6  | 26.52 | 0.02-<br>0.05 | 6.5-<br>10.0 | 33.3   | [89]         |
| PEDOT:PSS/CN<br>T                                                         | PEI                    | 15.9    | 0.76–<br>0.42 | 65.8  | 15.22 | 0.03-<br>0.07 | 45.2         | 36.5   | [90]         |
| PEDOT:PSS,-<br>AgNP                                                       | Cotton                 | 112.5   | 0.87–<br>0.58 | 45.8  | 35.22 | 0.07-<br>0.08 | 20.8         | 56.8   | [91]         |
|                                                                           | <b>Woven</b>           |         |               |       |       |               |              |        |              |
| PEDOT:PSS-<br>rGO/AgNWS                                                   | Nylon<br>Fibers        | 245.5   | 0.25–<br>0.45 | 15.8  | 31.22 | 0.05-<br>0.09 | 12.5         | 20.0   | [92]         |
| rGO0PEDOT:P<br>SS                                                         | Cotton<br>fibers       | 365     | 0.15-<br>0.65 | 25.8  | 65    | 0.04-<br>0.08 | 120          | 16.5   | This<br>work |

**Note:** Reference Materials are obtained from cross reference which may variable in results. Authors, may not assure the liability or any miss happen related to results presented in table.4

## Electronic Supplementary Information (ESI-S2)

### 2. CHARACTERIZATIONS

The Scanning electron microscopy (SEM) analysis of the sample was performed by using a Zeiss ultra-scanning electron microscope (SEM) for the surface of the treated and untreated fabrics. Nicolet 5700 Thermofisher, (USA) was used for FTIR/ATR analysis of the GO, rGO, and PEDOT: PSS-rGO nano-composites films and coated fabric. A K-alpha mode on XPS (Thermofisher USA), X-ray diffraction (XRD), and (XPS) used to describe the rGO, GO, and PEDOT: PSS-rGO films and nano-composites. The NEXUS- XPS was recorded using an XPS spectrometer with a monochromatic Al K- $\alpha$  source of 1486.68 eV. The electrical performance of the rGO and PEDOT PSS decorated cotton fabric was measured by using a four-point probe (SZT-2B) system (Suzhou Genisis Electronics Co.Ltd., China). The average test results with a low sheet resistance of each sample were measured six times and recorded for statistical analysis. The electrical performance of the rGO and PEDOT PSS decorated cotton fabric was measured by using a four-point probe (SZT-2B) system (Suzhou Genisis Electronics Co.Ltd., China).

#### 2.1 X-Ray Diffraction

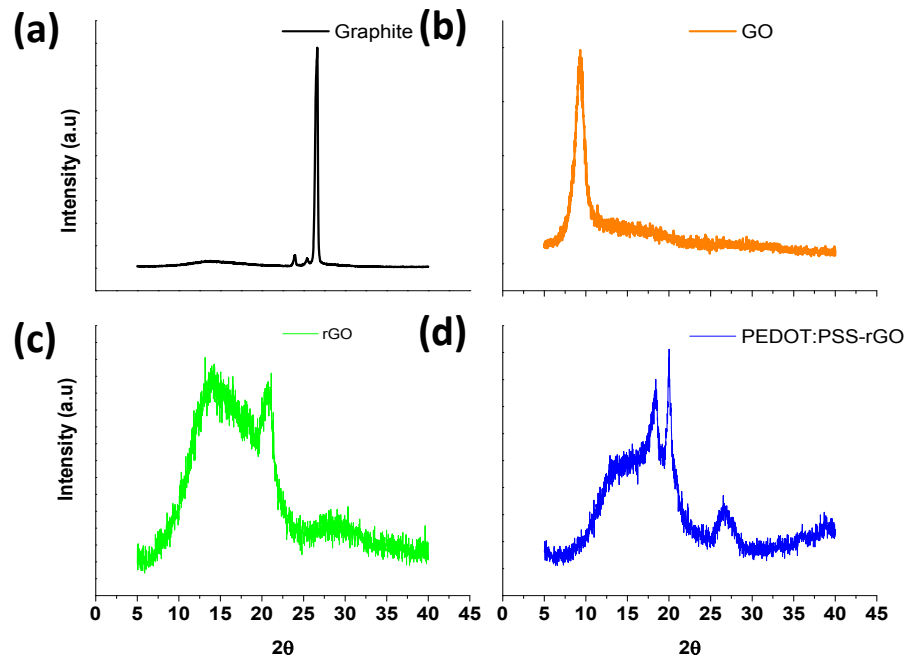

**Fig .1** X-Ray Diffraction analysis of Graphite a), Graphene Oxide (GO) b), reduced Graphene oxide (rGO) c) and PEDOT:PSS-rGO nanocomposites d)

## 2.2 FTIR Spectroscopy

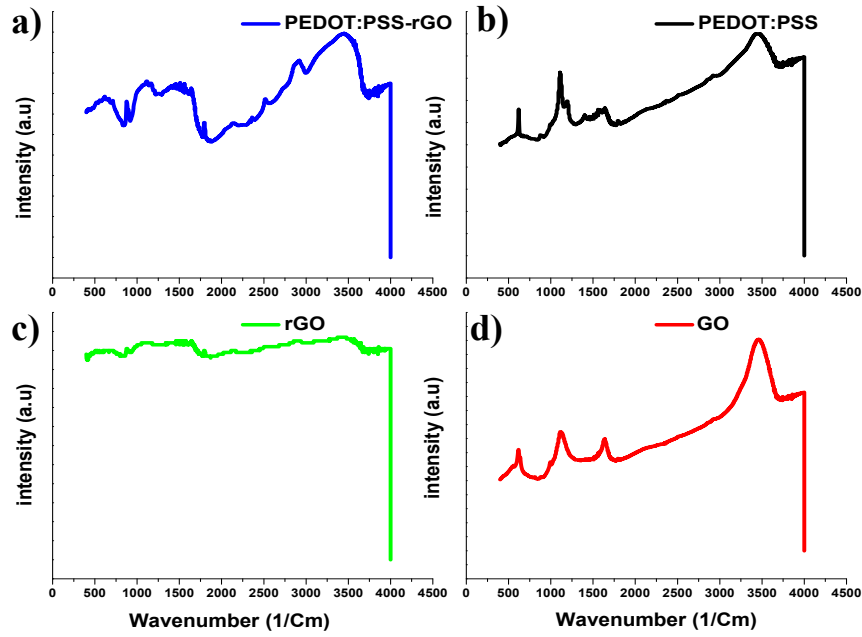

Fig .2 FTIR Spectroscopy analysis of PEDOT:PSS-rGO nanocomposites a), PEDOT:PSS b), reduced Graphene oxide (rGO) c) and Graphene oxide (GO) d)

## 2.3 Raman Spectroscopy

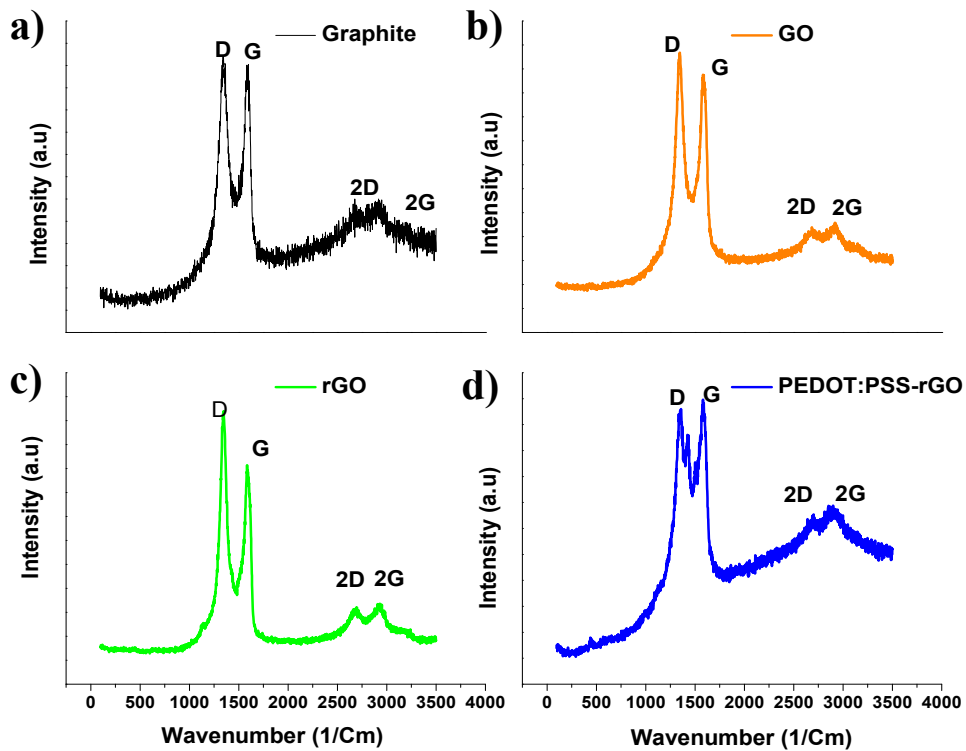

**Fig.3** Raman Spectra analysis of Graphite a), Graphene Oxide (GO) b), reduced Graphene oxide (rGO) c) and PEDOT:PSS-rGO nanocomposites d)

### 3 XPS Spectroscopy

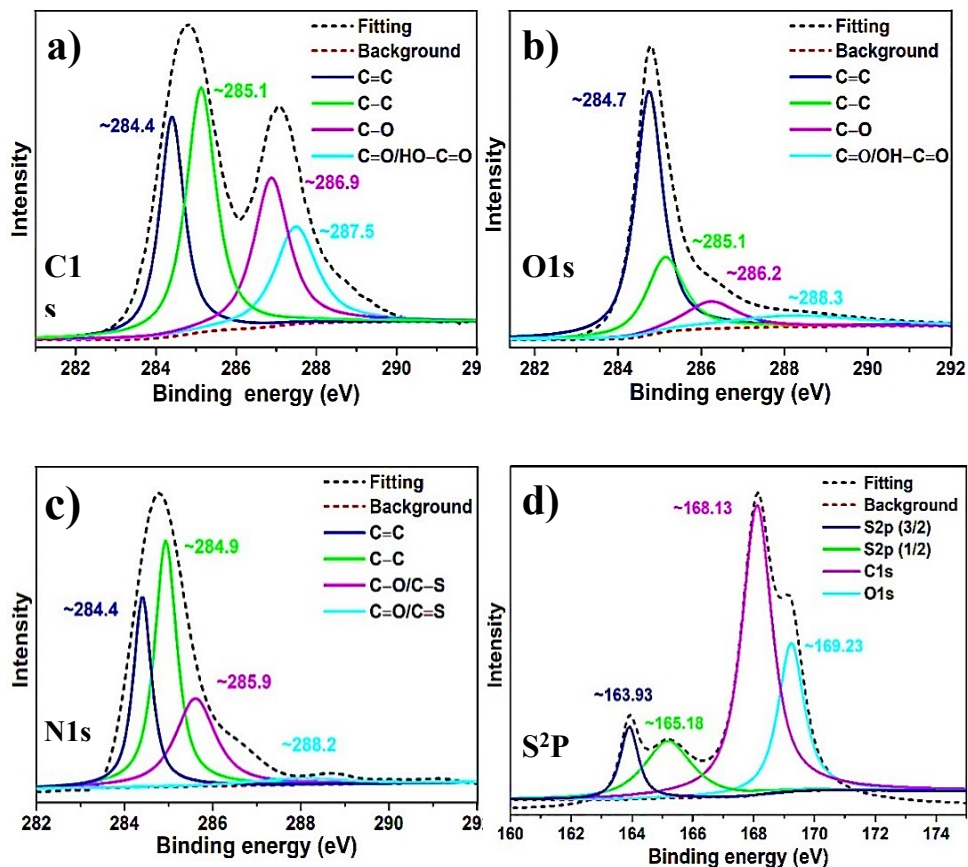

**Fig:4** XPS analysis of reduced graphene oxide (rGO) and PEDOT:PSS-rGO showing C1s a) O1s b) N1s c) and S2P Peaks

## Electronic Supplementary Information

### Measurement of Textile Properties (ESI-S3)

#### 1. Textile Properties

##### 1.1 Sheet Resistance with Dyeing and Washing Cycles

##### 1.2 and Tensile Strength and Stretching and Bending Cycles

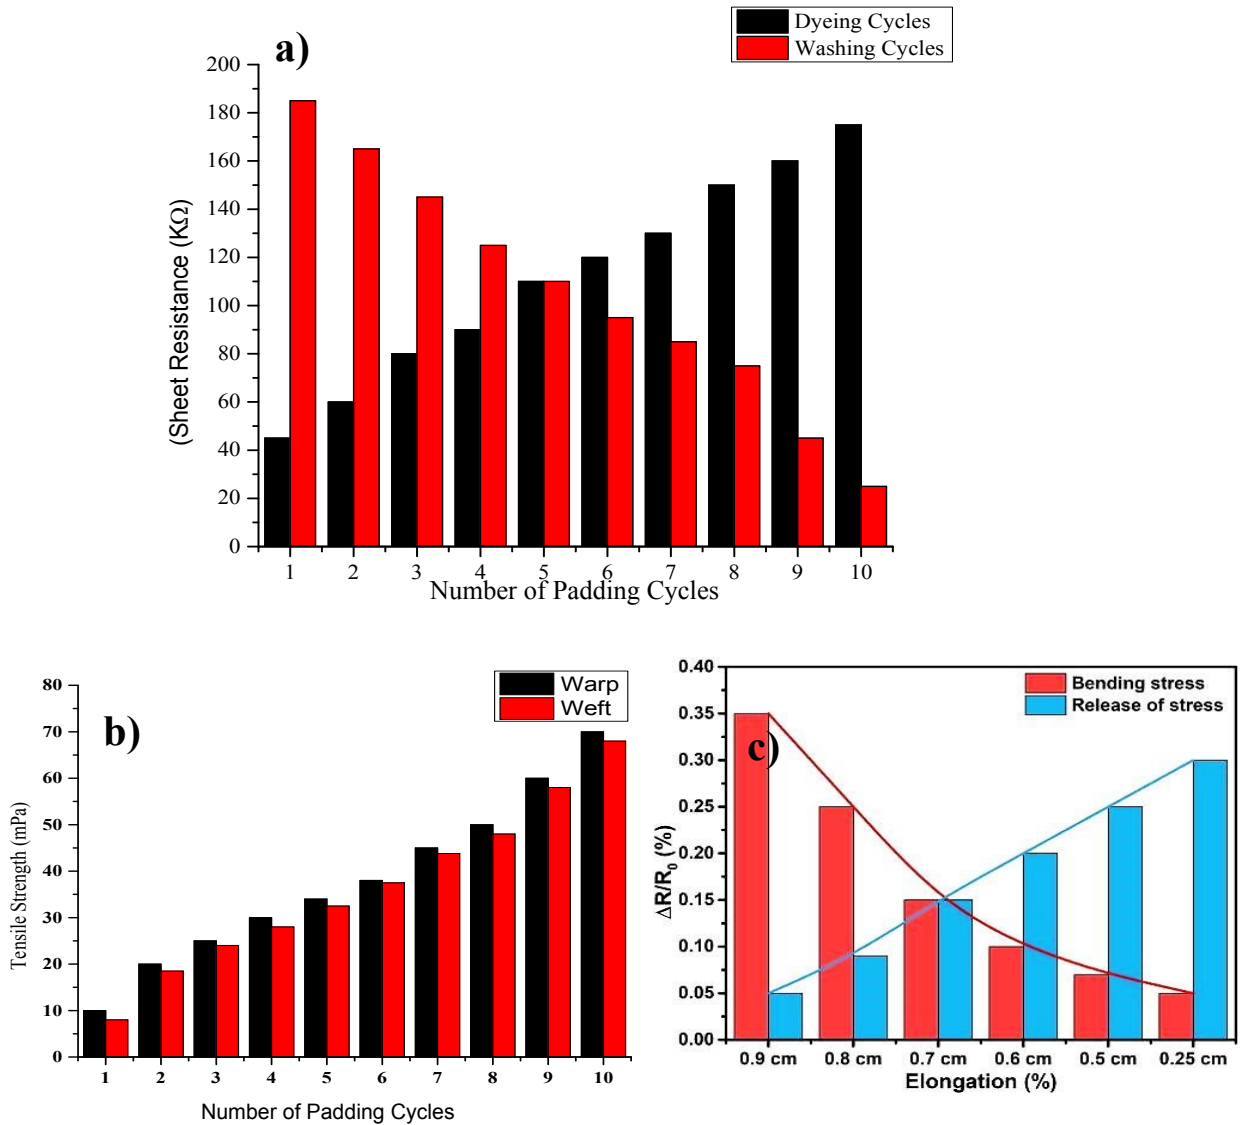

**Fig:1** Sheet resistance with number of dyeing cycles and washing cycles a) Tensile strength with number of padding cycles b) Stretching and bending cycles

### 1.3 Weight pick up and Particle size distribution

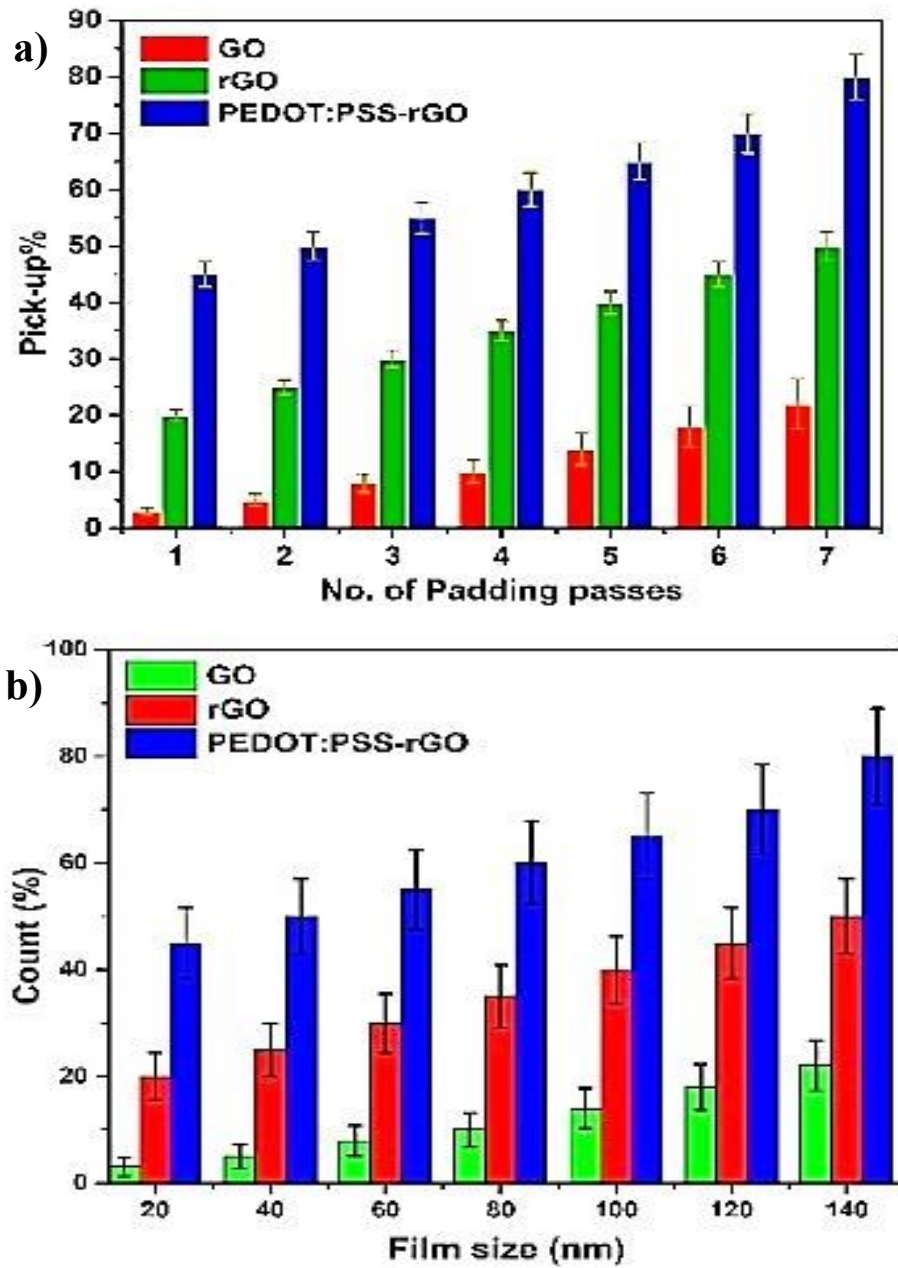

**Fig: 2** Weight pickup percentage and particle size distribution of GO, rGO and PEDOT:PSS-rGO nanocomposites on woven fabric



## 2. Thermoelectric Performance

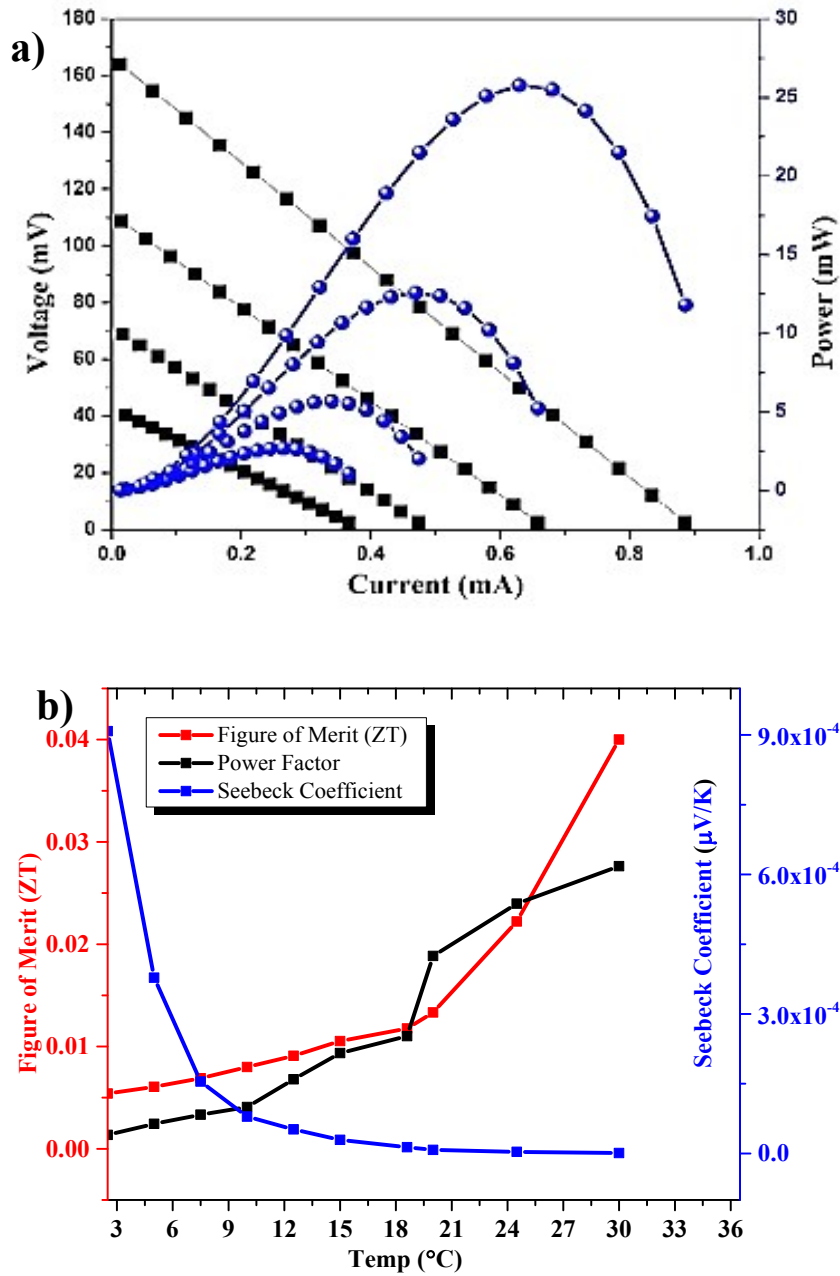

**Fig:3** Current Vs output voltage and power relationship a) Thermoelectric performance of the TE device with figure of merit, power factor and seebeck coefficient over temperature gradient of 2.5-36.5 C

## Electronic Supplementary Information ESI-4

### 3. Potential Biomedical Application and Health monitoring

#### 3.1 Electrocardiogram (ECG) Response

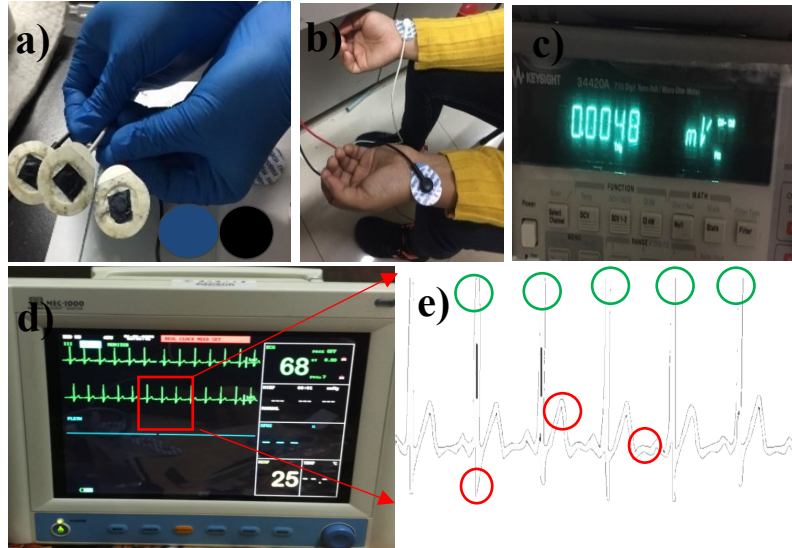

**Fig:1** Output Thermoelectric performance of Textile based Developed TE device, for real time biomedical and health monitoring application performance measurement for ECG electrodes attached to Digital Cardiogram device a) The placement of disposable electrode on commercially available ECG Probes placed on human wrist b) rGO, PEDOT: PSS coated woven Fabric as disposable ECG electrodes attached to volunteer wearing sports bra c) Performance as an Electrical output voltage mV AC signal response obtained and used for ECG performance of the developed device d) Output ECG signal response extended obtained ECG signal response e) for real time biomedical and health monitoring application. **Reproduced with copyright Material from Material & Design, 2020.**

#### 3.2 Pressure Sensor Response

The response of the sensor with the change of sheet resistance to develop the PP sensor was connected with the electrodes to measure response. To record the response of the sensor, we used Instron micro-tester programmed and software Bench View 5.0. Following the method of ASTM D-5034 standard on Universal Testing Machine (UTM) Ortega to analyse the tensile strength of the samples. We used the Instron Model-335 to analyse tensile strength for rGO-coated PP samples whenever we increased the load resultant sheet resistance were also increased, and for the reducing of load, the sheet resistance was decreased. For the change of sheet resistance from 0.2% to 1.5%, the electrical conductivity was 1.5% recorded, as shown in Fig. 4.3a and it was the maximum. At different loading and unloading in the unit of kPa, the sensitivity response of the wearable pressure sensor was 0.050–0.089 kPa, which can detect the small deflection and pressure of human body movement.

### 3.3 Electrocardiogram and Pulse rate response and 3.4 Pressure Sensor response

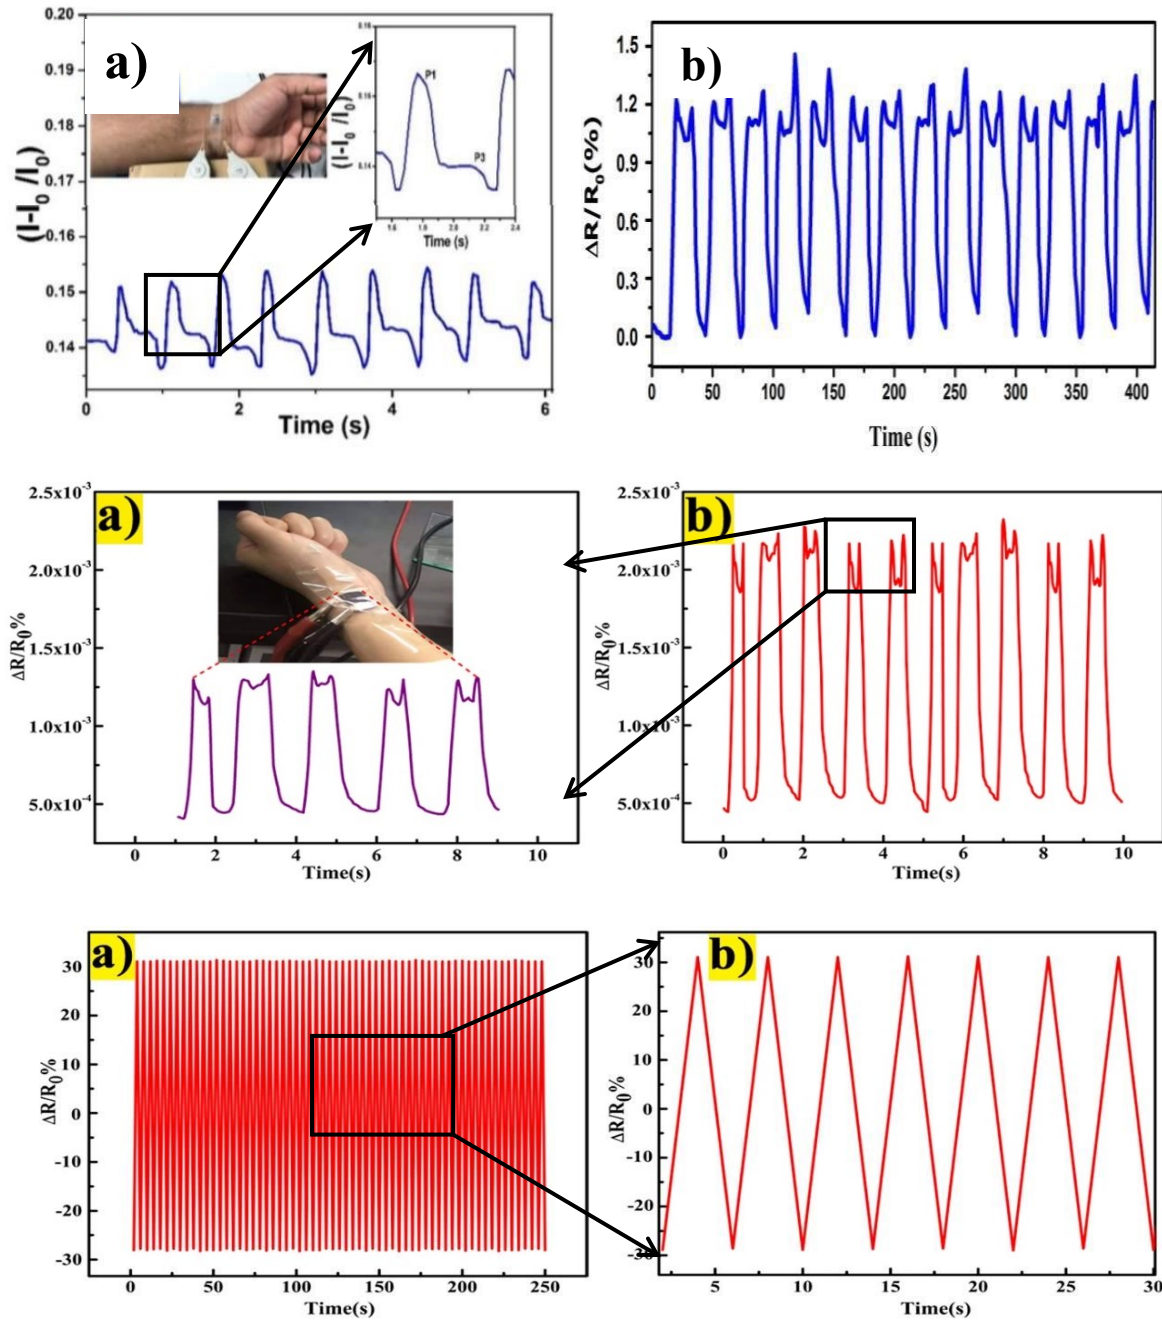

**Fig: 2** ECG Signal response as recorded compared with original ECG Signal a) Pulse rate response detected on human wrist b) Pressure responses obtained with knee a) extended version of pressure response as resistive type sensor b) Pressure responses obtained with knee a) extended version of pressure response as resistive type sensor b) Pressure responses obtained with knee a) extended version of pressure response as resistive type sensor b) **Reproduced with permission of copyright material of Sensors and actuators, and Materials & Design. 2020**

# Electronic Supplementary Information (ESI-S5)

## Methods

### 1. Fabrication Pad Dry Cure

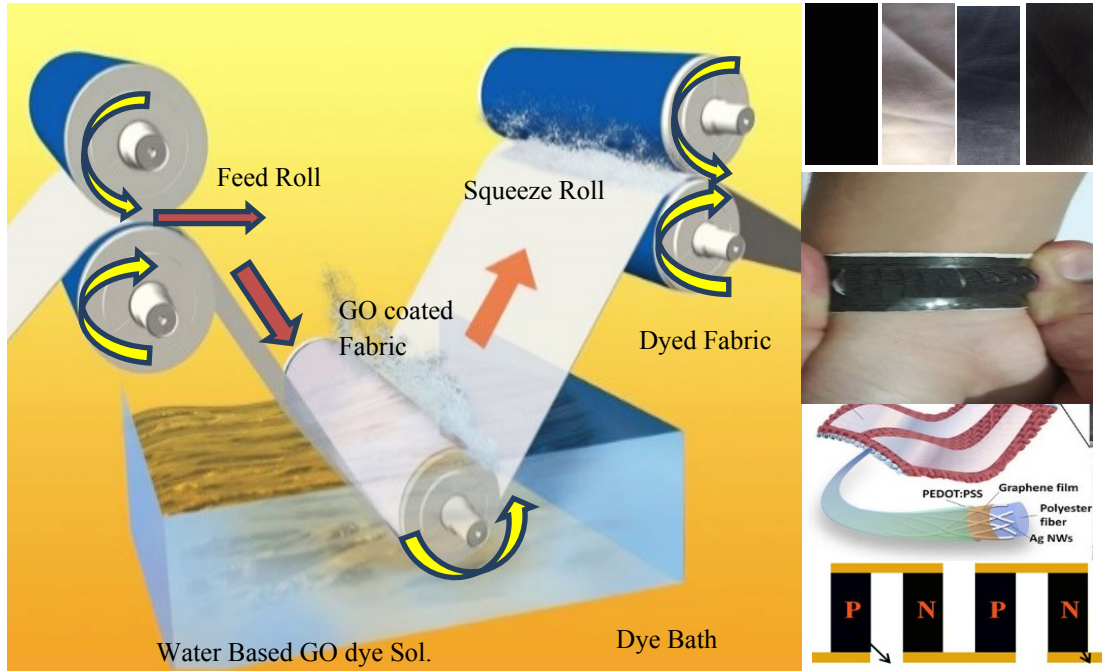

**Fig:1** Fabrication of Graphene on Textile Substrate using Pad Dry Cure Unit for textile based Thermoelectric Nano generator

## 2. Designing of Thermoelectric Device

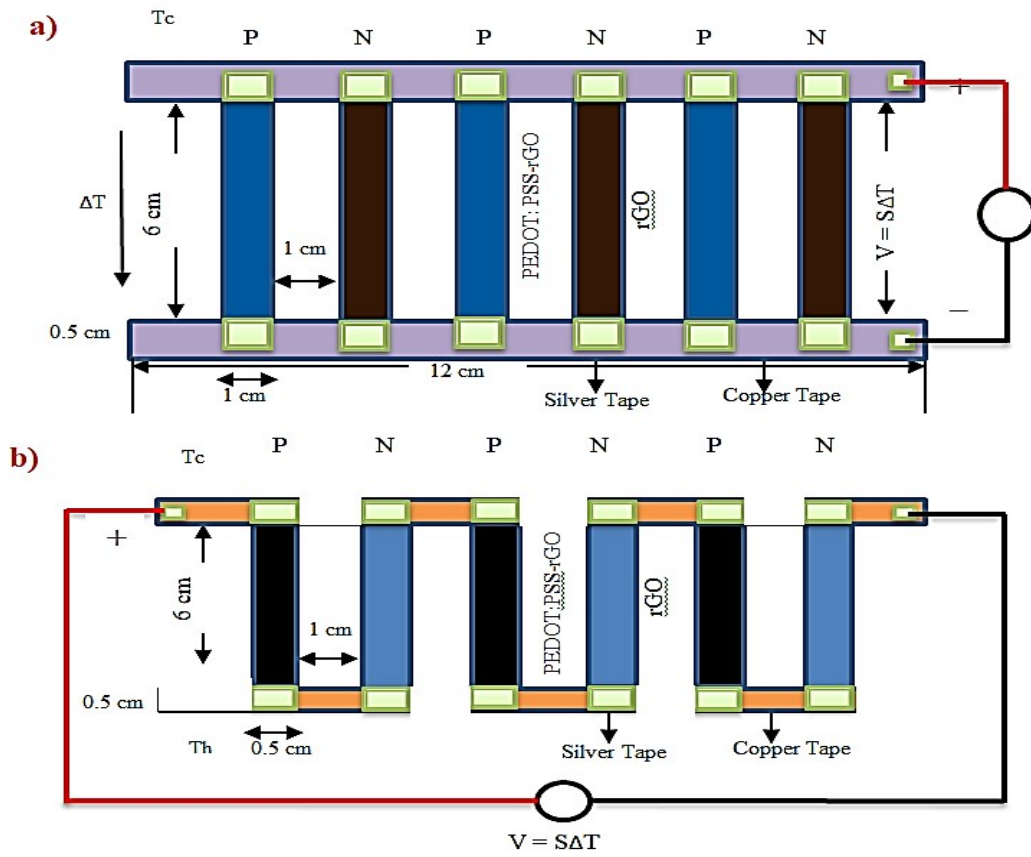

**Fig.2** TE design model P- N type legs rGO, rGO/PEDOT: PSS Connected in parallel a) and Series b) arrangement with a closed-Circuit
